# Supplementary material for: Engaging Mood Brain Circuits with Psilocybin (EMBRACE): a study protocol for a randomized, placebo-controlled and delayed-start, neuroimaging trial in depression
Source: PubMed Central journal article supplement (PMC11221029; doi:10.1186/s13063-024-08268-6), 2024-07-03
Supplement: 13063_2024_8268_MOESM4_ESM.pdf [file 13063_2024_8268_MOESM4_ESM.pdf]

| PMID     | Design                                 | Participants                       | Interventions                                                                                    | ΔMADRS at 24 h                                                                                 | Other                                                                                        |
|----------|----------------------------------------|------------------------------------|--------------------------------------------------------------------------------------------------|------------------------------------------------------------------------------------------------|----------------------------------------------------------------------------------------------|
| 24821196 | Randomized, double-blind, cross-over   | 18 adults with MDD                 | 50 mg of ketamine hydrochloride (saline placebo comparator)                                      | Mean difference between ketamine and placebo was $7.6 \pm 3.7$ (95% CI = 3.9 to 11.3)          | Response rates at 24 h of 8/18 following ketamine and 1/18 following placebo ( $p = 0.033$ ) |
| 29656663 | Randomized, double-blind, parallel arm | 66 adults with MDD and suicidality | 84 mg of esketamine twice weekly for 4 weeks (placebo comparator)                                | Least-squares mean difference between esketamine and placebo was 7.5 (SE = 3.29, $p = 0.029$ ) | Remission rates at 24 h of 12/35 following esketamine and 5/31 following placebo             |
| 23803871 | Randomized, double-blind, cross-over   | 27 adults with unipolar depression | 0.54 mg/kg for 30 min (placebo comparator)                                                       | Mean difference between ketamine and placebo was 5.7 (95% CI = 1.8 to 6.2)                     | Response rate at 24 h of 10/27 following ketamine and 1/27 following placebo                 |
| 23982301 | Randomized, double-blind, parallel arm | 73 adults with TRD                 | 0.5 mg/kg of ketamine hydrochloride for 40 min (0.045 mg/kg midazolam comparator)                | Mean difference between ketamine and midazolam was 7.95 (95% CI = 3.20 to 12.71)               | Response rate at 24 h of 64% following ketamine and 28% following midazolam                  |
| 29903051 | Randomized, double-blind, parallel arm | 29 adults with TRD                 | 1 mL/kg of ayahuasca adjusted to contain 0.36 mg/kg of N-dimethyltryptamine (placebo comparator) | Mean difference between ayahuasca and placebo was 14.9                                         | Response rate at 24 h of 50% following ayahuasca and 46% following placebo                   |
