# Supplementary material for: Engaging Mood Brain Circuits with Psilocybin (EMBRACE): a study protocol for a randomized, placebo-controlled and delayed-start, neuroimaging trial in depression
Source: PubMed Central journal article supplement (PMC11221029; doi:10.1186/s13063-024-08268-6), 2024-07-03

# CONSORT Participant Randomization Flowchart

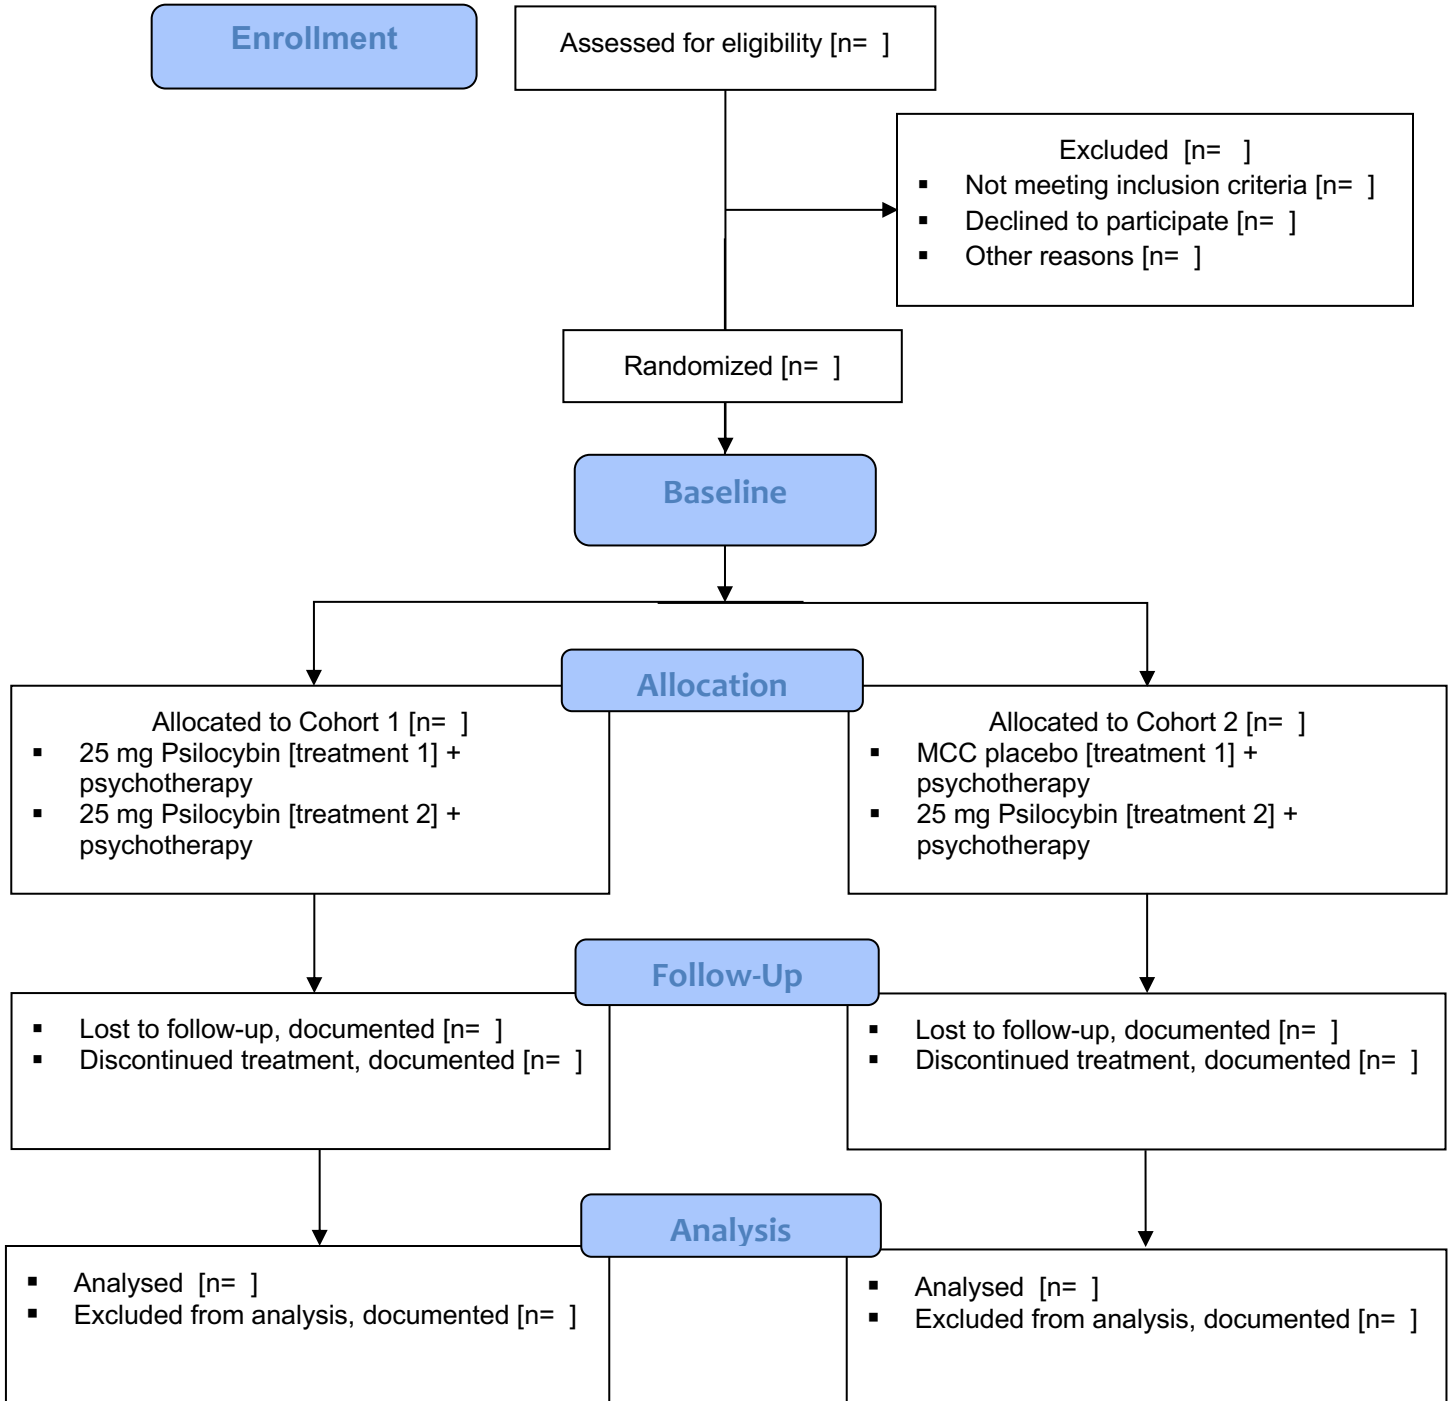

Supplement: 13063_2024_8268_MOESM5_ESM.pdf [file 13063_2024_8268_MOESM5_ESM.pdf]
